# Supplementary material
Source: publisher figshare collection journal article supplement (https://gsapubs.figshare.com/ndownloader/files/22747619)

## DATA REPOSITORY 2010092

Figure 1 Data Repository:

Reconstruction of the the blocks separated by an interconnected dike network.

The pattern indicates maximum extension close to horizontal and intermediate extension at right angles, close to vertical.

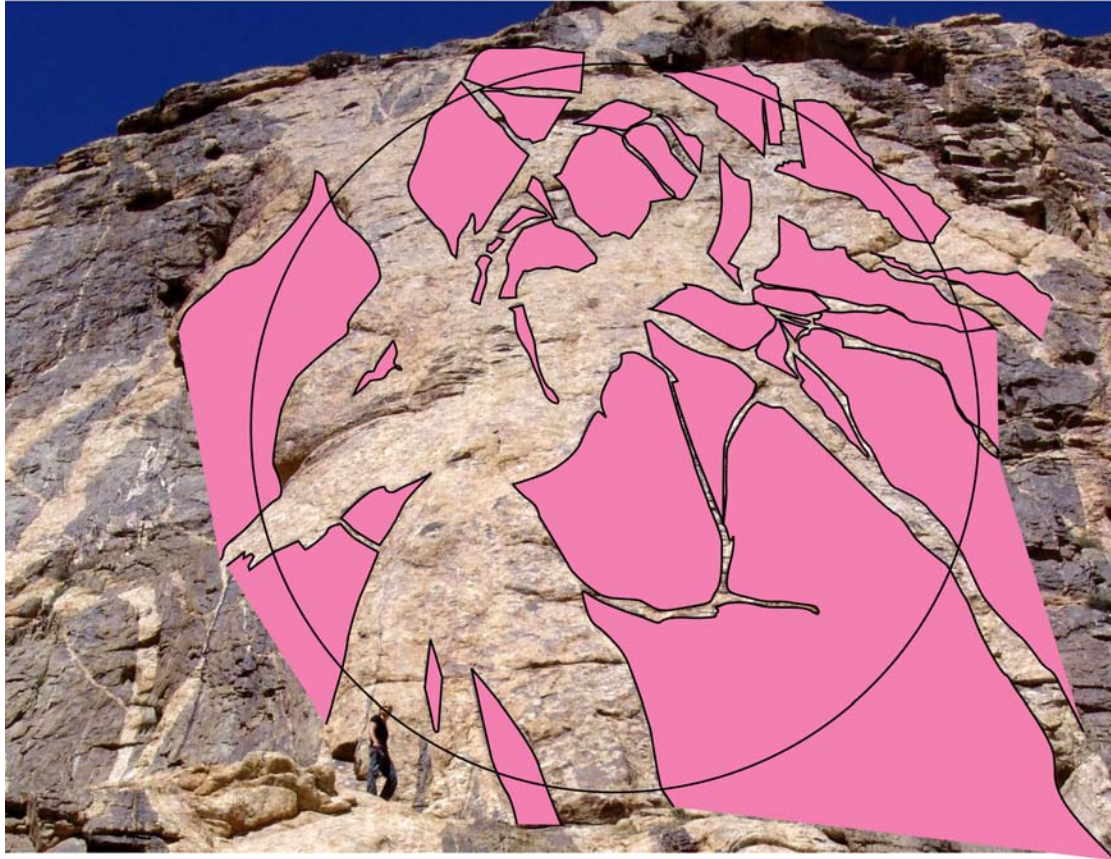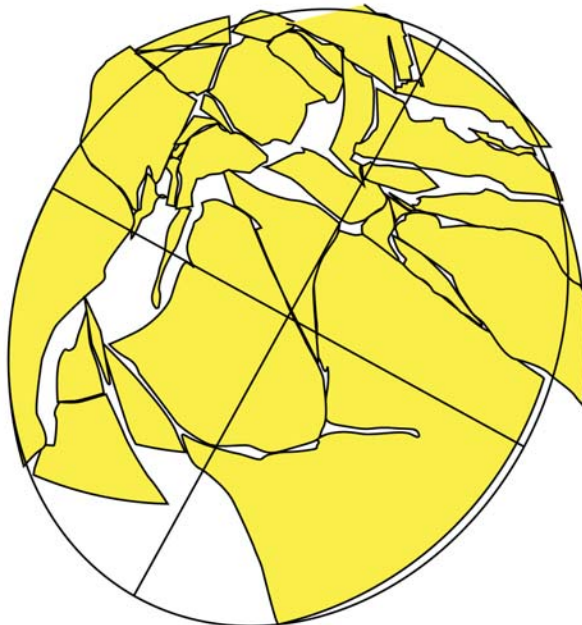

**Figure DR1. Two-dimensional reconstruction of calc-silicate blocks.** Dilation accommodated by intrusion accounts for an extension of approximately 36 and 15 % of the long and short axis of the original ellipse (right-hand-side). Uncertainties of approximately 5% in strain estimates are related to magmatic erosion of calc-silicate blocks, and the angle and irregularities on the exposed surface.

Data Repository Figure 2: Lower hemisphere equal area stereonet projection of  
A: observed dike intersections determined from measured attitudes of dikes;  
B: dike attitudes used to determine dike intersections.

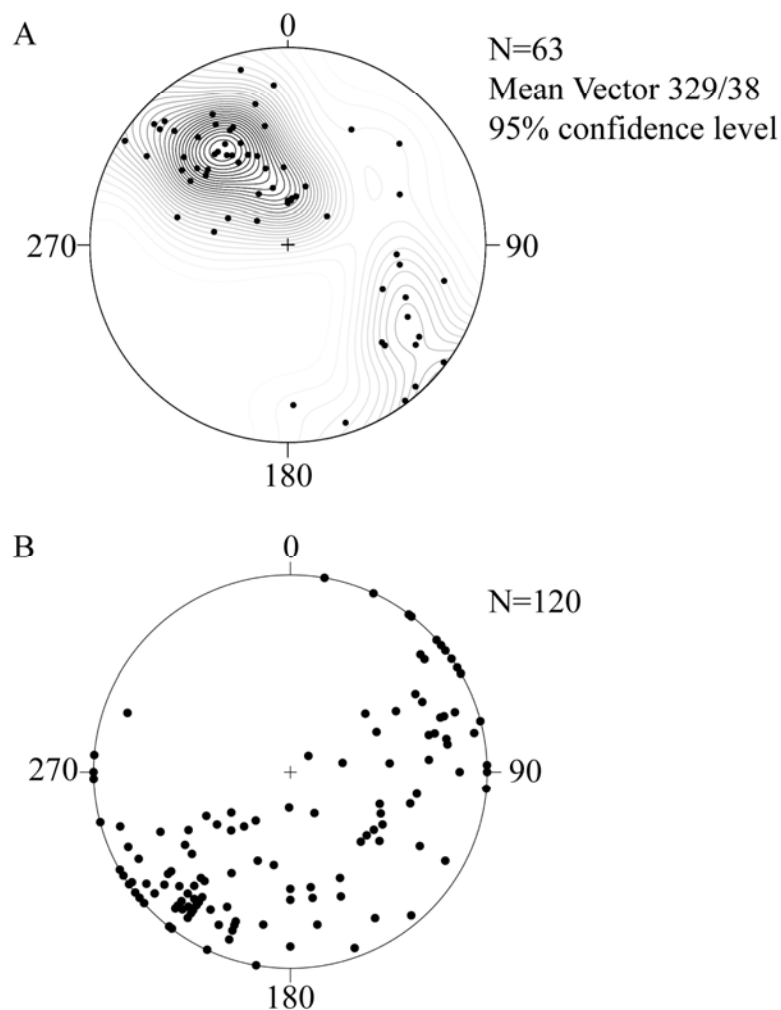

Supplement: Supplementary file 1 [file 22747619]
